# Supplementary material for: Evaluating the Characteristics of Diagnostic Items for Bridging Errors in Multi-Digit Subtraction
Source: Frontiers journal article supplement (doi:10.3389/feduc.2020.537531), 2020-10-02
Supplement: Data_Sheet_2.docx [file Data_Sheet_2.docx]

**Appendix B**

| Item id | Text |
| --- | --- |
| 0101 | Harry has 43 stickers. Harry gives 17 stickers to his sister. How many stickers has Carlo left? |
| 0102 | Mary has 83 marbles. She puts 27 marbles in the blue container, and she puts the remaining amount in the green container. How many marbles does she put in the green container? |
| 0103 | Harry inflates 75 balloons for his party. He hangs 27 balloons outside. The remaining balloons he hangs inside. How many balloons does he hang inside? |
| 0201 | Harry buys two trousers for a total of 283 Euro. On trouser costs 126 Euro. How many Euros does the other trouser cost? |
| 0202 | The car of Mary is broken. The repair costs 473 Euro. The parents of Mary pay 427 Euro. How many Euros does Mary have to pay herself? |
| 0203 | Harry wants to buy a bike. At bike store “The wheel” the bike costs 983 euro. At bike store “Fast” costs the bike 716 euro. How many euros does the bike cost less at bike store “Fast”? |
| 0301 | Mary plays a computer game. Mary had 336 points. She loses 74 points. How many points does she have now? |
| 0302 | Harry has 136 songs on his mp3-player. He removes 52 songs. How many songs does Harry keep? |
| 0303 | Mary has 175 shells. 82 of these shells are black. The remaining shells are white. How many white shells does Mary have? |
| 0401 | Soccer club ‘In the Field’ has 456 members. 172 of the members are female. How many members of Soccer club ‘in the Field’ are male? |
| 0402 | Mary has a farm with 816 brown and white chickens. 755 chickens are brown. How many chickens are white? |
| 0403 | Harry buys a computer and a computer screen. He has to pay 864 euro in total. The computer screen costs 173 euro. How many Euros does the computer cost? |
| 0501 | Mary has 80 animal pictures. On 42 of the pictures a cat is shown. On the remaining pictures a butterfly is shown. On how many pictures is a butterfly shown? |
| 0502 | Mary buys 70 containers of lemonade for a party. 43 containers have been drunk. How many containers are left over? |
| 0503 | Harry’s granddad is 80 years old. Harry is exactly 66 years younger. How old is Harry? |
| 0601 | 305 tickets for a play are sold. 23 people can’t make it because of bad weather. How many people in total do show up for the play? |
| 0602 | Harry has won 206 coins at a carnival. He buys a stuffed animal for 62 coins. How many coins does Ruben have left? |
| 0603 | Mary wants to paste 309 pictures in an album. She has already pasted 54 pictures into the album. How many pictures does she have left to paste? |
| 0701 | There are 200 chairs in a ballroom. 62 chairs are taken. How many chairs are not taken? |
| 0702 | Harry buys cloths for 300 euro. He gets a discount of 72 euro at the counter. How many euros does Harry have to pay? |
| 0703 | Harry has 400 euro. He buys a trouser for 17 euro. How many euros does he have left? |
| 0801 | Harry organizes a town party. He has invited 1000 people. 70 people cannot make it to the party. How many people can make it to party? |
| 0802 | Marry has ordered 1000 bricks for the house she is building. 40 bricks broke during transport. How many bricks are whole? |
| 0803 | Marry has 1000 kilograms salt. She needs 10 kilograms to make a bread. How much kilogram salt does Marry has left? |
| 0901 | Harry has 1000 euro in his bank account. With this money he buys a radio for 260 euro. How much money has Harry left? |
| 0902 | Harry and Marry drive home from France. This is exactly 1000 kilometres. Mary drives the first part, 340 kilometres. Harry drives the remaining distance. How many kilometres does Erik drive? |
| 0903 | A new coffee maker costs 1000 coupons. Harry has 850 coupons. How many coupons does he have to save? |
